# Supplementary material for: Malleable and self-healing rubbers covalently crosslinked by reversible boronic ester bonds
Source: Royal Society of Chemistry journal article supplement (doi:10.1039/d2sm01127a), 2022-01-01
Supplement: d2sm01127a1.pdf [file d2sm01127a1.pdf]

## Supplementary Information

### **Malleable and self-healing rubbers covalently crosslinked by reversible boronic ester bonds**

Jiahao Zhang,<sup>1</sup> Liming Cao,<sup>2,\*</sup> Yukun Chen<sup>1,\*</sup>

*1 Lab of Advanced Elastomer, School of Mechanical and Automotive Engineering, South China University of Technology, 381 Wushan Road, Tianhe District, Guangzhou, 510640, China.*

*2 College of Food Science, South China Agricultural University, Guangzhou 510642, China.*

\* Corresponding Author: Yukun Chen ([cyk@scut.edu.cn](mailto:cyk@scut.edu.cn)); Liming Cao ([lmcao@scau.edu.cn](mailto:lmcao@scau.edu.cn))

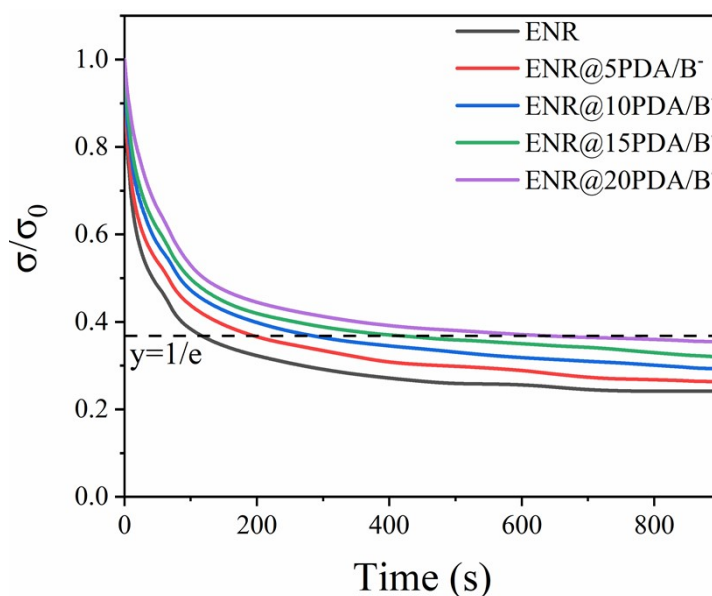

**Figure S1** Stress relaxation curves of ENR and the crosslinked rubbers at 100°C.

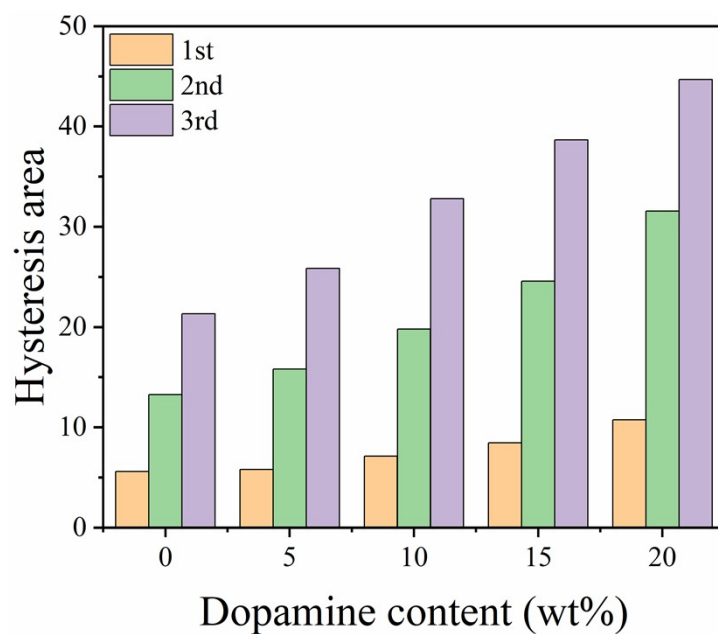

**Figure S2** Hysteresis areas of ENR and the crosslinked rubbers.

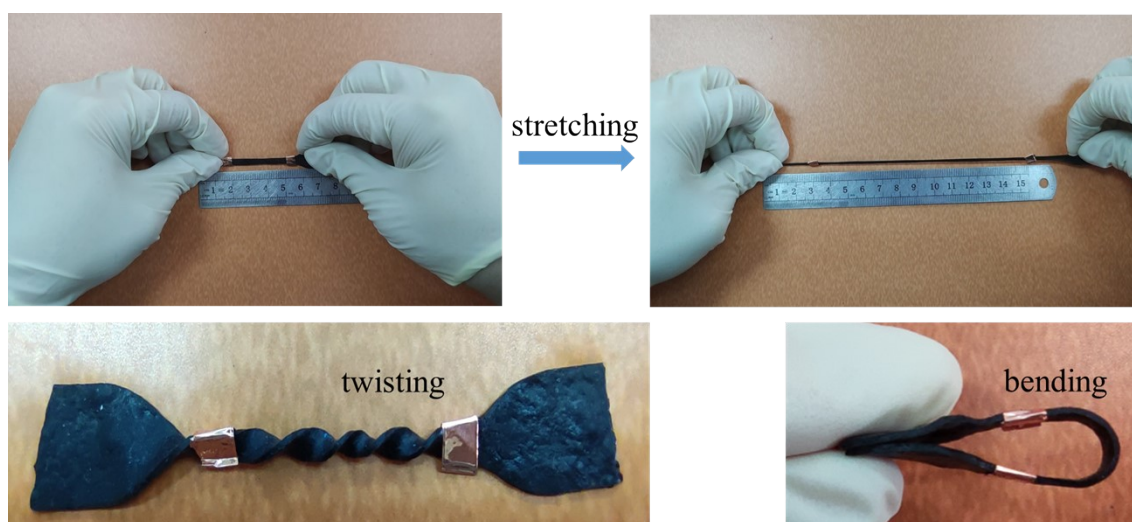

**Figure S3** Photographs of the healed ENR@10PDA/B- under external force.

### Equilibrium swelling experiment

$$V_e = -\frac{1}{V} \left[ \frac{\ln(1 - V_r) + V_r + \chi V_r^2}{V_r^{\frac{1}{3}} - \frac{V_r}{2}} \right] \quad (1)$$

$$V_r = \frac{\frac{m_2}{\rho_1}}{\frac{m_2}{\rho_1} + \frac{m_1 - m_2}{\rho_2}} \quad (2)$$

$$\text{Swelling ratio} = \frac{m_1 - m_2}{m_2} \times 100\% \quad (3)$$

$V_e$ —The cross-link density of ENR, mol/cm<sup>3</sup>

$V_r$ —The volume fraction of rubber in the swollen sample

$\chi$ —The Flory–Huggins polymer–solvent interaction term (0.393)

$V$ —The molar volume of toluene (106.2 cm<sup>3</sup>/mol)

$\rho_1$ —The densities of rubber (0.94g/cm<sup>3</sup>)

$\rho_2$ —The densities of toluene (0.865g/cm<sup>3</sup>)

$m_1$ —The mass of the swollen sample

$m_2$ —The mass of the dried rubber

### Logarithmic form of Arrhenius formula

$$\ln(\tau) = \ln(\tau_0) + \frac{E_a}{RT}$$

$\tau$  —The relaxation time of the crosslinked rubber (s)

$\tau_0$ —The characteristic relaxation time at infinite temperature

$R$  —The universal gas constant (8.314 J/(mol·K))

$T$  —The testing temperature (Thermodynamic temperature, K)

$E_a$  — The activation energy of the crosslinked rubber (kJ/mol)
